# Supplementary material
Source: PubMed Central journal article supplement (PMC2633645)

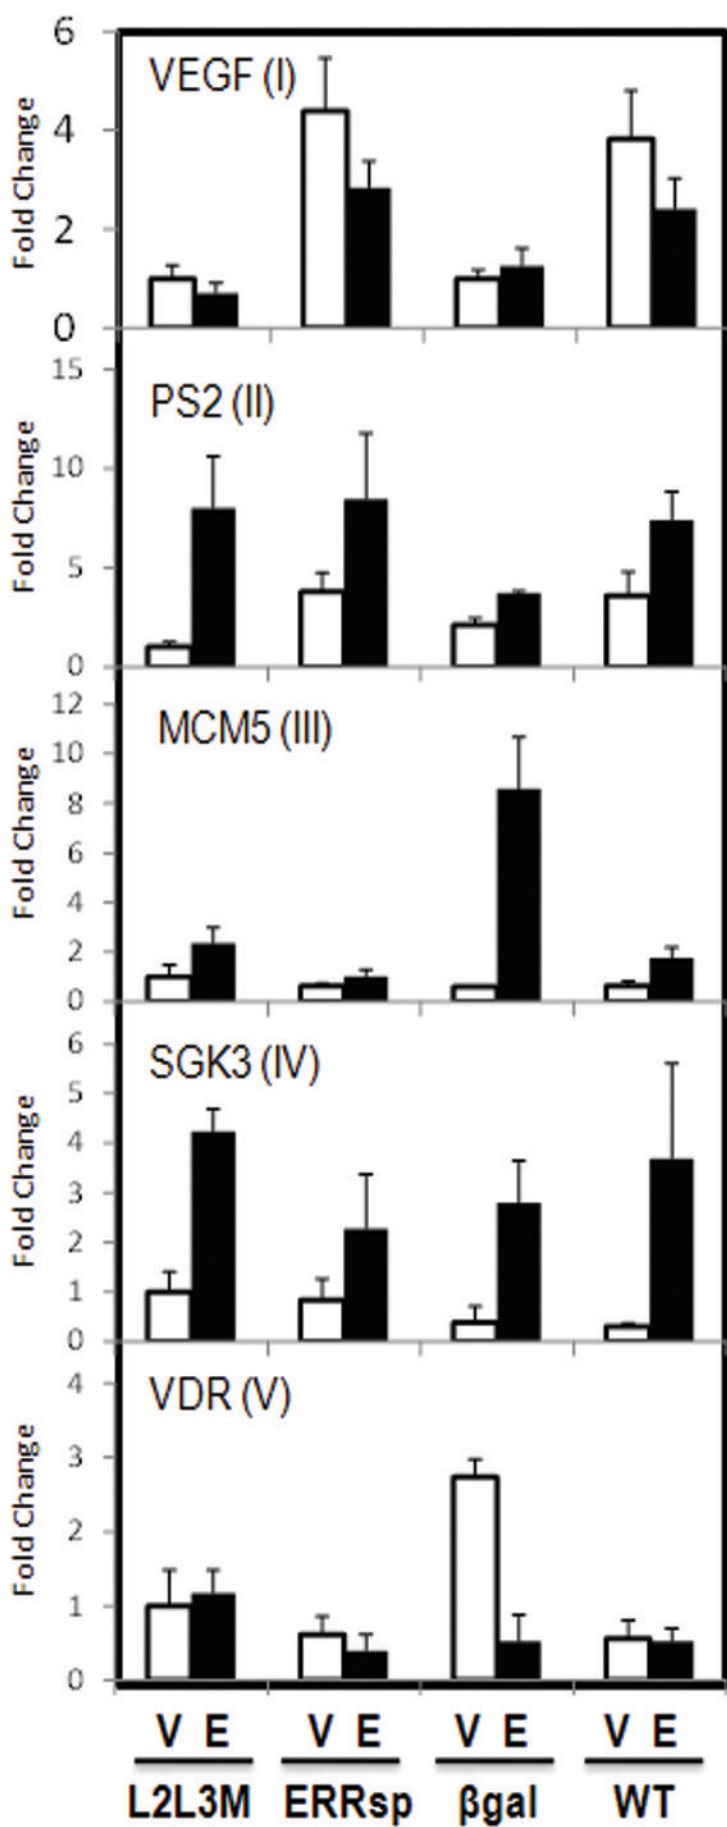

Supplement: NIHMS69046-supplement-6.pdf [file NIHMS69046-supplement-6.pdf]
